# Supplementary material for: Swedish Population Substructure Revealed by Genome-Wide Single Nucleotide Polymorphism Data
Source: PLoS One. 2011 Feb 9;6(2):e16747. doi: 10.1371/journal.pone.0016747 (PMC3036708; doi:10.1371/journal.pone.0016747)
Supplement: Table S2 — Pairwise FST values (multiplied by 10,000) between European populations. (XLS) [file pone.0016747.s012.xls]

## Sheet: Sheet1
Table S2. Pairwise FST values (multiplied by 10,000) between European populations.
x 10,000	SWE	SWEmix	FIW	FIE	GER	BRI	CEU	RUS	ORC	FRE	FRB	ITN	TSI	SAR
SWE	0	12.4	24.2	70.3	6.5	10.4	7.4	29.8	35.6	21	100	43.7	52	136.9
SWEmix	12.4	0	29.7	72	22.3	25.1	25.1	40.8	55.5	38.8	116.1	65.9	68.6	157.6
FIW	24.2	29.7	0	30.3	34.5	44	41.5	34.4	71	60.1	141.6	86.2	94.2	192.6
FIE	70.3	72	30.3	0	85	96	94.1	69	126.2	112.5	202.5	150.9	149.5	252.9
GER	6.5	22.3	34.5	85	0	4.9	4.3	28.2	32.4	13.2	91.4	33.8	38.3	121.5
BRI	10.4	25.1	44	96	4.9	0	1.2	38.3	26.9	7.4	81.7	29.9	31.8	110.2
CEU	7.4	25.1	41.5	94.1	4.3	1.2	0	36.3	28.5	5.8	82.2	29.7	33.2	111.9
RUS	29.8	40.8	34.4	69	28.2	38.3	36.3	0	64.8	50.4	135.5	74.8	80.9	178.5
ORC	35.6	55.5	71	126.2	32.4	26.9	28.5	64.8	0	40.1	112.5	69.6	63.3	146.5
FRE	21	38.8	60.1	112.5	13.2	7.4	5.8	50.4	40.1	0	72.2	14.4	17.4	87.3
FRB	100	116.1	141.6	202.5	91.4	81.7	82.2	135.5	112.5	72.2	0	77.9	81.4	131
ITN	43.7	65.9	86.2	150.9	33.8	29.9	29.7	74.8	69.6	14.4	77.9	0	8.7	69.9
TSI	52	68.6	94.2	149.5	38.3	31.8	33.2	80.9	63.3	17.4	81.4	8.7	0	62.5
SAR	136.9	157.6	192.6	252.9	121.5	110.2	111.9	178.5	146.5	87.3	131	69.9	62.5	0
In underlined comparisons, FST differs from zero (Bonferroni-corrected p < 0.02).
The matrix is visualized in Figure S2a. Abbreviations as in Table 1 and Fig. S2.
