# Supplementary material for: Swedish Population Substructure Revealed by Genome-Wide Single Nucleotide Polymorphism Data
Source: PLoS One. 2011 Feb 9;6(2):e16747. doi: 10.1371/journal.pone.0016747 (PMC3036708; doi:10.1371/journal.pone.0016747)
Supplement: Table S3 — Pairwise FST values (multiplied by 10,000) between Swedish and Finnish provinces. (XLS) [file pone.0016747.s013.xls]

## Sheet: Table S3.
Table S3. Pairwise FST values (multiplied by 10,000) between Swedish and Finnish provinces.
x 10,000	VNBO	VNO	GAV	STO	UPP	SMA	VARD	ORE	VMA	OGO	JON	KAG1	KRO	BLE	SKA	MAL	HAL	VGO	GOB	SWF	SAT	SSOB	SOB	HAM	NOB	KAI	SAV	NKAR
VNBO	0	9.8	12.4	14.6	11.6	16.5	16.3	15.7	13.1	19	19.5	12.5	21.6	18.9	19.1	18	16.8	22.6	20.4	30.4	37.8	23.4	48.4	48.8	64	88.4	83	79.2
VNO	9.8	0	1.3	4.2	0.8	5.6	4.5	3.7	4.6	9.8	10.7	5.9	8.2	11	12.8	9.3	12.3	9.5	8.7	24.8	35.2	13.6	42.7	36.2	59.5	79.8	79.7	69.7
GAV	12.4	1.3	0	1.6	0.3	3.8	0.7	-2	1.4	6.4	7.6	-1.5	6.8	5.8	6.8	6.2	7.4	4.7	5.9	24.3	36.3	20.9	42.6	45.1	67.9	87.5	81.2	73.8
STO	14.6	4.2	1.6	0	-0.4	-0.5	4.1	0.6	0.2	3	3.4	0.8	3.2	1.5	3.4	2.8	1.5	2.6	3.9	22.9	33.2	18.4	40.8	43.9	65.9	88.1	79.9	74.1
UPP	11.6	0.8	0.3	-0.4	0	-1.2	5.5	-0.5	-0.4	3.4	4.9	2.4	4.3	1.7	2.8	3.1	-0.4	2.4	-0.5	18.8	31.1	15	42.1	38.3	62.9	80.8	74.5	65.7
SMA	16.5	5.6	3.8	-0.5	-1.2	0	8.4	-2.9	0.3	3.4	6.4	0.7	5.2	5.9	2.4	2.7	0.3	2.3	-0.2	24.4	31.7	17.2	40.9	44.8	63.6	81	82	69.4
VARD	16.3	4.5	0.7	4.1	5.5	8.4	0	2	1.4	6.2	10.6	0.9	6.1	2.5	5.7	9.3	7.7	6.4	5.2	25.9	36.9	25.9	40.2	45.4	63.2	80.4	83.7	70.2
ORE	15.7	3.7	-2	0.6	-0.5	-2.9	2	0	-2.6	1.3	4.6	-0.4	3.2	2.4	2.7	3	-2.1	1.2	3.1	21.3	29.2	18.5	37.7	42.1	63.7	86.8	79	72.4
VMA	13.1	4.6	1.4	0.2	-0.4	0.3	1.4	-2.6	0	5.1	6.6	0.5	5.2	3.1	4.9	5.6	-0.4	1.9	-2.9	20.2	31	16.4	33.3	38.4	66.3	89.7	84.2	75.2
OGO	19	9.8	6.4	3	3.4	3.4	6.2	1.3	5.1	0	7.5	0.5	7	6.5	6.2	4.8	4.7	3.9	6	26.5	35.8	22.5	51.2	50.9	74	97.9	91.5	81.7
JON	19.5	10.7	7.6	3.4	4.9	6.4	10.6	4.6	6.6	7.5	0	0	4.4	4.7	4.6	3.2	3.1	3.5	3.6	31.7	41.1	29.7	54.2	58	78.8	96.6	93.1	85.2
KAG1	12.5	5.9	-1.5	0.8	2.4	0.7	0.9	-0.4	0.5	0.5	0	0	0	-5.2	1.8	-1.9	7.4	2.7	-6	25	37.7	13.4	47.3	48.7	70.8	93.9	86.2	81.4
KRO	21.6	8.2	6.8	3.2	4.3	5.2	6.1	3.2	5.2	7	4.4	0	0	0.2	3.1	2.5	3.1	5.9	1.7	31.3	39.4	33	54.8	49.2	77.4	100	92.7	82.5
BLE	18.9	11	5.8	1.5	1.7	5.9	2.5	2.4	3.1	6.5	4.7	-5.2	0.2	0	1.3	3.1	1.4	2.5	1.9	29.8	35.6	24.4	44.1	50.1	77.6	98.9	93.1	82.1
SKA	19.1	12.8	6.8	3.4	2.8	2.4	5.7	2.7	4.9	6.2	4.6	1.8	3.1	1.3	0	1.9	1.8	4.2	-0.3	32.8	40.5	26	51	53.4	78.5	97.9	93.9	85.9
MAL	18	9.3	6.2	2.8	3.1	2.7	9.3	3	5.6	4.8	3.2	-1.9	2.5	3.1	1.9	0	3.4	5	1.9	31.5	48	27.4	47.8	58.4	78	104.7	99.1	86.4
HAL	16.8	12.3	7.4	1.5	-0.4	0.3	7.7	-2.1	-0.4	4.7	3.1	7.4	3.1	1.4	1.8	3.4	0	-0.2	0.9	30.3	39.9	20.9	50.1	55.7	77.8	96.2	88.5	84.3
VGO	22.6	9.5	4.7	2.6	2.4	2.3	6.4	1.2	1.9	3.9	3.5	2.7	5.9	2.5	4.2	5	-0.2	0	1.8	30.6	39.8	26.3	50.8	53.3	75.7	97.5	90.5	85
GOB	20.4	8.7	5.9	3.9	-0.5	-0.2	5.2	3.1	-2.9	6	3.6	-6	1.7	1.9	-0.3	1.9	0.9	1.8	0	30.8	38.1	24.3	53.8	57.2	78.1	102.7	95.4	90.6
SWF	30.4	24.8	24.3	22.9	18.8	24.4	25.9	21.3	20.2	26.5	31.7	25	31.3	29.8	32.8	31.5	30.3	30.6	30.8	0	6.8	21	28.9	14.5	34.1	51.1	44.1	43.2
SAT	37.8	35.2	36.3	33.2	31.1	31.7	36.9	29.2	31	35.8	41.1	37.7	39.4	35.6	40.5	48	39.9	39.8	38.1	6.8	0	21.2	28	22.5	36.5	55.2	48.6	41.5
SSOB	23.4	13.6	20.9	18.4	15	17.2	25.9	18.5	16.4	22.5	29.7	13.4	33	24.4	26	27.4	20.9	26.3	24.3	21	21.2	0	6.7	30.8	48.5	68	65.5	59
SOB	48.4	42.7	42.6	40.8	42.1	40.9	40.2	37.7	33.3	51.2	54.2	47.3	54.8	44.1	51	47.8	50.1	50.8	53.8	28.9	28	6.7	0	25	53.3	64.8	63	50.4
HAM	48.8	36.2	45.1	43.9	38.3	44.8	45.4	42.1	38.4	50.9	58	48.7	49.2	50.1	53.4	58.4	55.7	53.3	57.2	14.5	22.5	30.8	25	0	24.7	42.4	28.5	34.6
NOB	64	59.5	67.9	65.9	62.9	63.6	63.2	63.7	66.3	74	78.8	70.8	77.4	77.6	78.5	78	77.8	75.7	78.1	34.1	36.5	48.5	53.3	24.7	0	16.3	16	17.8
KAI	88.4	79.8	87.5	88.1	80.8	81	80.4	86.8	89.7	97.9	96.6	93.9	100	98.9	97.9	104.7	96.2	97.5	102.7	51.1	55.2	68	64.8	42.4	16.3	0	17.2	25.8
SAV	83	79.7	81.2	79.9	74.5	82	83.7	79	84.2	91.5	93.1	86.2	92.7	93.1	93.9	99.1	88.5	90.5	95.4	44.1	48.6	65.5	63	28.5	16	17.2	0	9.4
NKAR	79.2	69.7	73.8	74.1	65.7	69.4	70.2	72.4	75.2	81.7	85.2	81.4	82.5	82.1	85.9	86.4	84.3	85	90.6	43.2	41.5	59	50.4	34.6	17.8	25.8	9.4	0
In underlined comparisons, FST differs from zero (Bonferroni-corrected p < 0.05). The matrix is visualized in Figure S2b.
1 KAG = KAL + GOT; other abbreviations as in Table S1.
