# Supplementary material for: Swedish Population Substructure Revealed by Genome-Wide Single Nucleotide Polymorphism Data
Source: PLoS One. 2011 Feb 9;6(2):e16747. doi: 10.1371/journal.pone.0016747 (PMC3036708; doi:10.1371/journal.pone.0016747)
Supplement: Table S5 — Number of SNPs with geographical differentiation within Sweden located in genome areas associated with eight phenotypes. (XLS) [file pone.0016747.s015.xls]

## Sheet: Sheet1
Table S5. Number of SNPs with geographical differentiation within Sweden located in genome areas associated with eight phenotypes.
Phenotype	Unique GWA hits	SNPs within 200 kb
		Total	SNPs with regional differences( p < 0.05)
			observed	expected	chi-square p1
Eye color	9	410	24	34.3025	0.08
Hair color	19	774	73	64.7564	0.29
Skin pigment	3	140	22	11.713	0.0037
Height	197	8683	680	726.46	0.08
Lactase deficiency	LCT gene	34	0	2.8446	0.11
Immune system	MHC region	1262	162	105.585	2e-05
Blood lipids	92	2465	257	206.233	0.00048
Cardiovascular disease	32	1921	190	160.72	0.015
1 Nominal significance from a chi-square test. Tests with Bonferroni-corrected p < 0.05 underlined.
