# Supplementary material for: Swedish Population Substructure Revealed by Genome-Wide Single Nucleotide Polymorphism Data
Source: PLoS One. 2011 Feb 9;6(2):e16747. doi: 10.1371/journal.pone.0016747 (PMC3036708; doi:10.1371/journal.pone.0016747)
Supplement: Table S8 — The numbers of SNPs and individuals in the different datasets after quality control. (XLS) [file pone.0016747.s018.xls]

## Sheet: Table S6.
Table S8. The numbers of SNPs and individuals in the different datasets after quality control.
	Number of SNPs			Number of individuals
Dataset	unpruned	pruned (r2 max)	tightly pruned (r2 max)	Swedes	North Europeans1	HGDP	HapMap	total
1	414022	52671 (0.15)	5797 (0.03)	753	0	860	725	2338
2	29339	24729 (0.30)	7192 (0.02)	755	1625	860	727	3967
3	353565	59798 (0.15)	5685 (0.001)	1525	0	0	0	1525
1 Swedes, Finns, Germans and British genotyped on Affymetrix 250K StyI
