# Supplementary material for: Swedish Population Substructure Revealed by Genome-Wide Single Nucleotide Polymorphism Data
Source: PLoS One. 2011 Feb 9;6(2):e16747. doi: 10.1371/journal.pone.0016747 (PMC3036708; doi:10.1371/journal.pone.0016747)
Supplement: Table S9 — The datasets used in each analysis. (XLS) [file pone.0016747.s019.xls]

## Sheet: Table S7.
Table S9. The datasets used in each analysis.
Analysis		Dataset1			Result2
Structure clustering
	between populations	2	T		F3, SF2
	within Sweden	3	T		F5a, SF6
FST distances
	between populations	2	T		SF3a, SF3b, ST2, ST3
	within Sweden	3	T		SF3c, ST4
identity by state (IBS) distributions
	between populations	2	P		F4, SF4
multidimensional scaling (MDS) of IBS
	between populations	2	P		F2a, F2b, SF1
	within Sweden	3	P		F2c, F2d, SF5
allele frequency differences
	between populations	2	P	S	T2
	Norrland vs. Götaland unsampled	3	P		text
	Norrland vs. other Swedes	1	U		SF9, ST5, ST6, ST7
	cases vs. controls	3	U		SF10
correlation of genetic and geographic distances		3	P		F5c
linkage disequilibrium (LD)		2	U	S	SF8
Barrier analysis		3	T		SF7
inbreeding		3	P		F5b
1 Dataset numbering as in Table S5. U = unpruned, P = pruned, T = tightly pruned;
S = populations sampled to equal size
2 Numbers of figures and tables that depict the analysis result. F = Figure, T = Table,
SF = Supplementary Figure, ST = Supplementary Table, text = only reported in the text.
